# Supplementary material for: Lurasidone for the Treatment of Major Depressive Disorder With Mixed Features: A Randomized, Double-Blind, Placebo-Controlled Study
Source: Atypon-hosted journal article supplement (doi:10.1176/appi.ajp.2015.15060770), 2015-11-10
Supplement: appi.ajp.2015.15060770.ds001.pdf [file appi.ajp.2015.15060770.ds001.pdf]

**FIGURE S1. Patient Disposition**

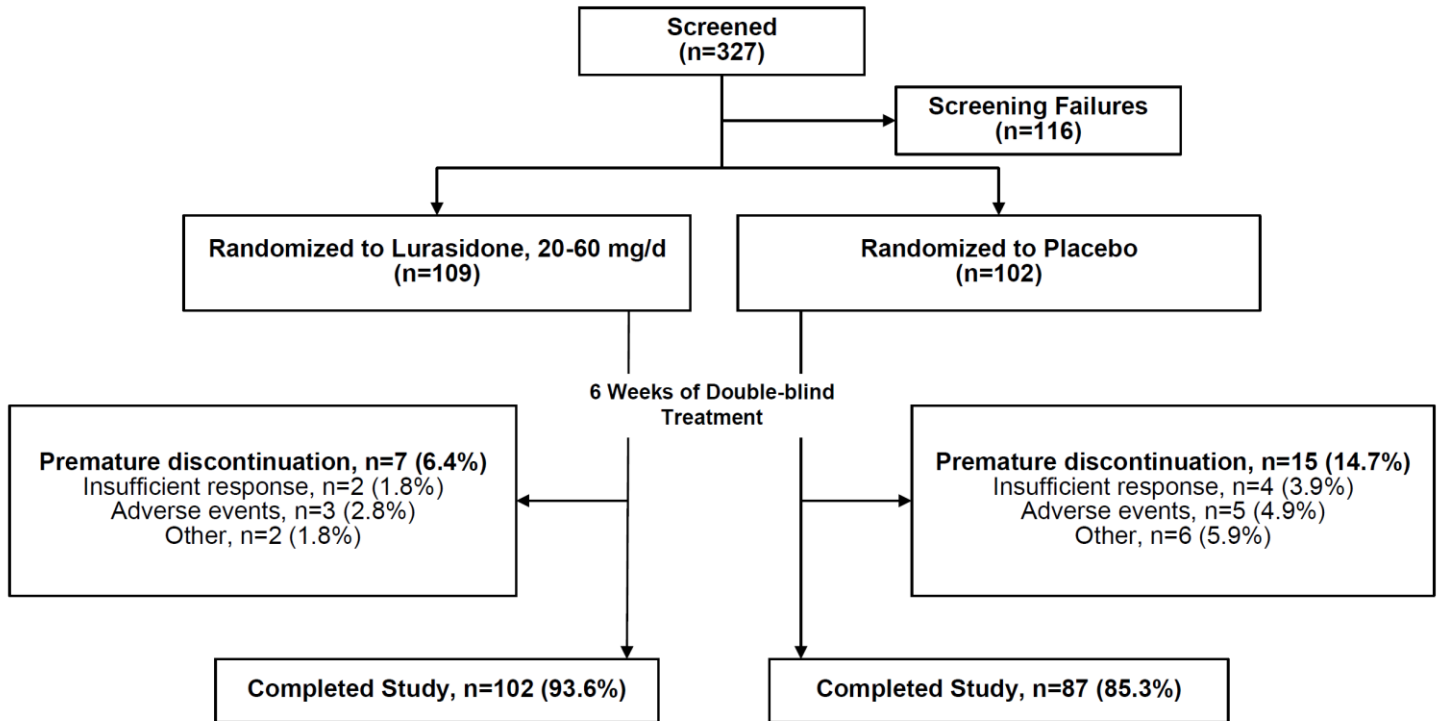

In the placebo group, 2 patients discontinued prior to receiving their first dose of study medication, and were excluded from the safety population
